# Supplementary material
Source: PubMed Central journal article supplement (PMC6690599)

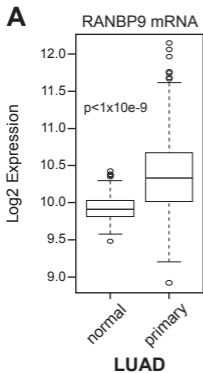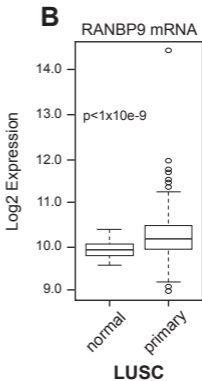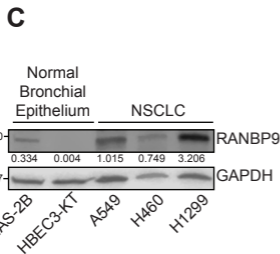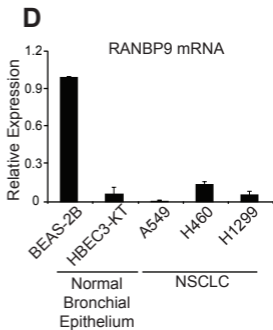

**Figure S1**

Supplement: NIHMS1044567-supplement-Fig_S1.pdf [file NIHMS1044567-supplement-Fig_S1.pdf]

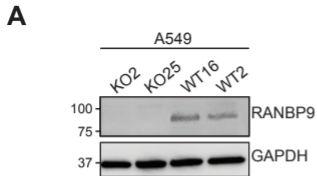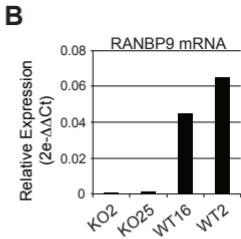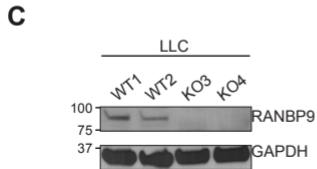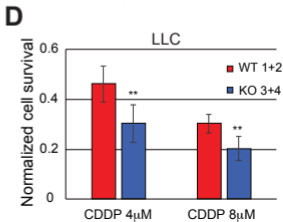

**Figure S3**

Supplement: NIHMS1044567-supplement-Fig_S3.pdf [file NIHMS1044567-supplement-Fig_S3.pdf]
